# Supplementary material for: Association between the COVID-19 pandemic and the risk for adverse pregnancy outcomes: a cohort study
Source: PubMed Central journal article supplement — BMJ Open. 2021 Feb 23;11(2):e047900. doi: 10.1136/bmjopen-2020-047900 (PMC7907630; doi:10.1136/bmjopen-2020-047900), 2021-02-23
Supplement: bmjopen-2020-047900supp001.pdf [file bmjopen-2020-047900supp001.pdf]

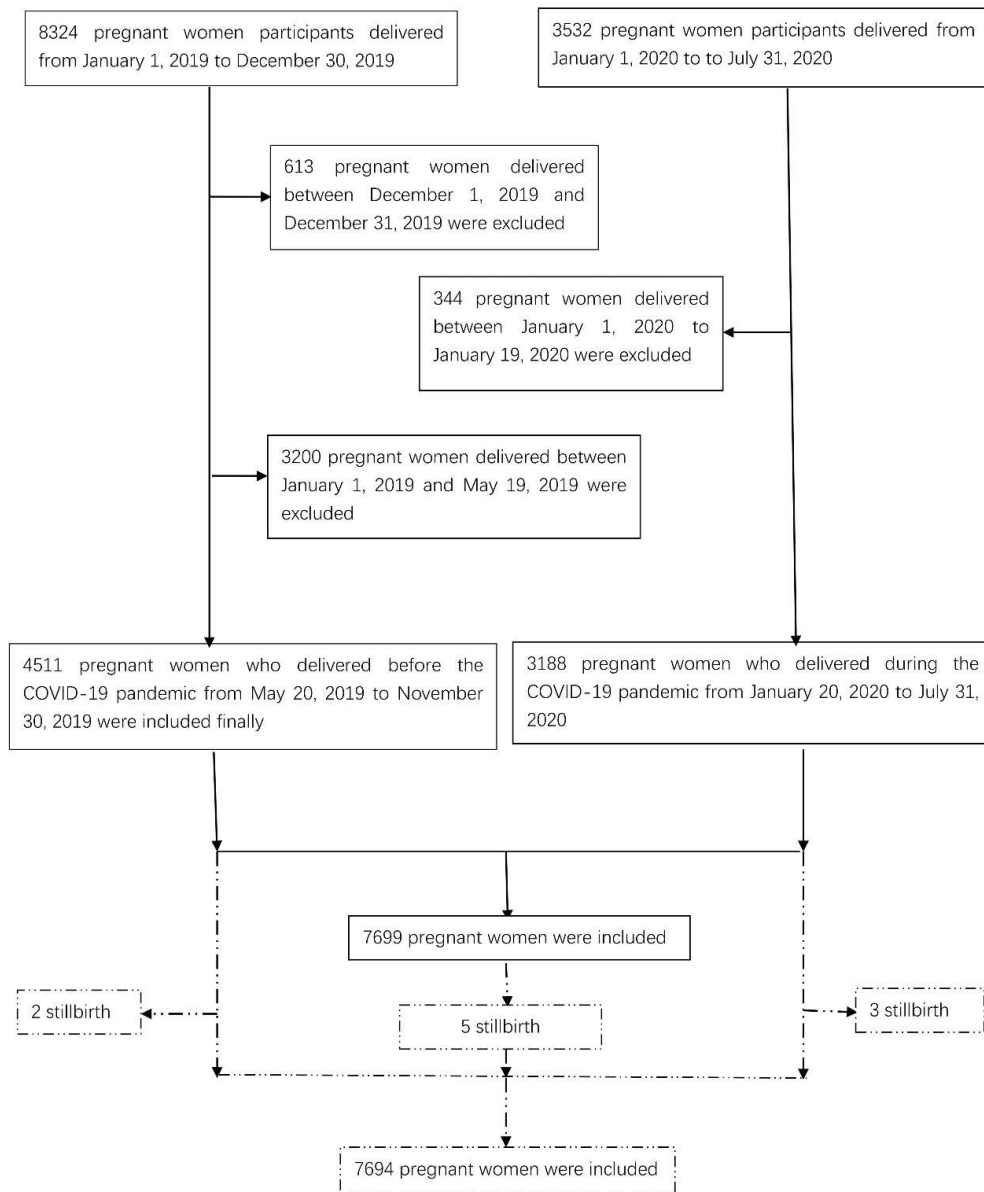

Supplemental Figure 1 The diagram of included and excluded participants

**Supplemental Table 1 Characteristics of 7694 pregnant women before and during COVID-19 pandemic**

| Items                                          | N / Mean (SD) | Pre COVID-19<br>(N,%; mean, SD) | COVID-19<br>(N,%; mean, SD) | $\chi^2/t$ | P       |
|------------------------------------------------|---------------|---------------------------------|-----------------------------|------------|---------|
| Maternal age (years)                           | 30.20 (3.95)  | 30.01 (3.89)                    | 30.45 (4.03)                | -4.771     | <0.0001 |
| Maternal age (years)                           |               |                                 |                             | 8.301      | 0.016   |
| ≤24                                            | 487 (6.33)    | 297 (6.59)                      | 190 (5.97)                  |            |         |
| 25-35                                          | 6112 (79.44)  | 3612 (80.11)                    | 2500 (78.49)                |            |         |
| ≥35                                            | 1095 (14.23)  | 600 (13.31)                     | 495 (15.54)                 |            |         |
| Ethnicity                                      |               |                                 |                             | 0.024      | 0.876   |
| Han                                            | 7222 (93.87)  | 4234 (93.90)                    | 2988 (93.81)                |            |         |
| Other                                          | 472 (6.13)    | 275 (6.10)                      | 197 (6.19)                  |            |         |
| Occupation                                     |               |                                 |                             | 0.13       | 0.677   |
| Unemployed                                     | 910 (11.87)   | 528 (11.74)                     | 382 (12.05)                 |            |         |
| Employed                                       | 6758 (88.13)  | 3970 (88.26)                    | 2788 (87.95)                |            |         |
| Education                                      |               |                                 |                             | 7.683      | 0.053   |
| Primary school or less                         | 33 (0.43)     | 21 (0.47)                       | 12 (0.38)                   |            |         |
| Junior high school                             | 578 (7.53)    | 355 (7.88)                      | 223 (7.02)                  |            |         |
| Senior high school                             | 3772 (49.11)  | 2251 (49.97)                    | 1521 (47.91)                |            |         |
| Undergraduate or above                         | 3297 (42.93)  | 1878 (41.69)                    | 1419 (44.69)                |            |         |
| Gravidity                                      | 2.01 (1.10)   | 2.01 (1.13)                     | 2.01 (1.07)                 | 0.165      | 0.869   |
| Gravidity                                      |               |                                 |                             | 1.988      | 0.370   |
| 1                                              | 3067 (39.86)  | 1809 (40.12)                    | 1258 (39.50)                |            |         |
| 2                                              | 2522 (32.78)  | 1450 (32.16)                    | 1072 (33.66)                |            |         |
| ≥3                                             | 2105 (27.36)  | 1250 (27.72)                    | 855 (26.84)                 |            |         |
| Parity                                         | 0.45 (0.53)   | 0.44 (0.53)                     | 0.46 (0.54)                 | -1.178     | 0.239   |
| Parity                                         |               |                                 |                             | 1.370      | 0.504   |
| 1                                              | 3191 (41.47)  | 1847 (40.96)                    | 1344 (42.20)                |            |         |
| 2                                              | 119 (1.55)    | 68 (1.51)                       | 51 (1.60)                   |            |         |
| ≥3                                             | 4384 (56.98)  | 2594 (57.53)                    | 1790 (56.20)                |            |         |
| History of miscarriage                         | 0.08 (0.32)   | 0.08 (0.31)                     | 0.09 (0.32)                 | -0.955     | 0.339   |
| History of miscarriage                         | 579 (7.72)    | 328 (7.27)                      | 251 (7.88)                  | 0.986      | 0.321   |
| History of induced abortion                    | 0.47 (0.77)   | 0.48 (0.78)                     | 0.45 (0.76)                 | 1.334      | 0.182   |
| History of induced abortion                    | 2598 (33.78)  | 1558 (34.57)                    | 1040 (32.65)                | 3.061      | 0.080   |
| Family history of chronic disease              | 927 (12.14)   | 480 (10.72)                     | 447 (14.16)                 | 20.540     | <0.001  |
| Pre-pregnancy BMI, kg/m <sup>2</sup>           | 22.24 (3.33)  | 22.22 (3.30)                    | 22.27 (3.36)                | -0.564     | 0.573   |
| Pre-pregnancy BMI, kg/m <sup>2</sup>           |               |                                 |                             | 2.467      | 0.481   |
| Underweight (18.5)                             | 676 (8.79)    | 392 (8.69)                      | 284 (8.92)                  |            |         |
| Normal (18.5–24.9)                             | 5714 (74.27)  | 3374 (74.83)                    | 2340 (73.47)                |            |         |
| Overweight (25–29.9)                           | 1077 (14.00)  | 609 (13.51)                     | 468 (14.69)                 |            |         |
| Obese (30)                                     | 227 (2.95)    | 134 (2.97)                      | 93 (2.92)                   |            |         |
| The rate of gestational weight gain (kg /week) | 0.42 (0.09)   | 0.42 (0.09)                     | 0.42 (0.09)                 | -1.044     | 0.297   |

|                         |              |              |              |       |       |
|-------------------------|--------------|--------------|--------------|-------|-------|
| Gestational weight gain |              |              |              | 6.338 | 0.042 |
| Insufficient            | 2112 (27.45) | 1203 (26.68) | 909 (28.54)  |       |       |
| Appropriate             | 3142 (40.84) | 1893 (41.98) | 1249 (39.22) |       |       |
| Excessive               | 2440 (31.71) | 1413 (31.34) | 1027 (32.24) |       |       |
| Prenatal visits         | 11.89 (3.37) | 11.91 (3.43) | 11.86 (3.27) | 0.562 | 0.574 |
| Prenatal visits         |              |              |              | 8.225 | 0.004 |
| <8                      | 822 (10.68)  | 520 (11.53)  | 302 (9.48)   |       |       |
| ≥8                      | 6872 (89.32) | 3989 (88.47) | 2883 (90.52) |       |       |
| Total                   | 7694 (100)   | 4509 (58.60) | 3185 (41.40) |       |       |

Missing data: occupation 26 (0.34%), education 14 (0.18%) history of induced abortion 2 (0.03%), and family history of chronic disease 59 (0.77%).

Supplemental Table 2 The influence of COVID-19 pandemic on pregnancy outcome

| Pregnancy outcomes                          | Model C (full model) |       |
|---------------------------------------------|----------------------|-------|
|                                             | aRR (95%CI)          | P     |
| <b>Maternal adverse outcomes</b>            |                      |       |
| Gestational diabetes <sup>b</sup>           | 0.93 (0.87, 1.01)    | 0.066 |
| Gestational hypertension <sup>b</sup>       | 0.94 (0.77, 1.14)    | 0.52  |
| Premature rupture of membranes <sup>b</sup> | 1.10 (1.03, 1.20)    | 0.007 |
| Caesarean section <sup>b</sup>              | 1.04 (0.98, 1.10)    | 0.189 |
| <b>Fetal adverse outcomes</b>               |                      |       |
| Stillbirth                                  | 1.00 (1.00, 1.00)    | 0.647 |
| Fetal distress <sup>b</sup>                 | 1.14 (1.01, 1.28)    | 0.033 |
| Preterm birth <sup>b</sup>                  | 0.75 (0.56, 1.02)    | 0.063 |
| Low birth weight <sup>b</sup>               | 0.87 (0.61, 1.24)    | 0.441 |
| Macrosomia <sup>b</sup>                     | 1.05 (0.87, 1.26)    | 0.608 |

Note : aRR, adjusted risk ratio; b these pregnancy outcomes all based on 7694 live birth data. Model C: controlling maternal age, ethnicity, occupation, education, gravidity, parity, history of miscarriage, history of induced abortion, pregnancy BMI, the rate of gestational weight gain, family history of chronic disease, the number of prenatal visit.
